# Supplementary material
Source: PubMed Central journal article supplement (PMC2673306)
Supplement: M900992200_1.pdf [file M900992200_1.pdf]

## Supplementary Material

| Diagnosis        | Sex | Age (years) | PMI (hours) | Brain Weight (grams) | Agonal State          | FTLD-U Subtype (2) | TDP-43 proteinopathy |
|------------------|-----|-------------|-------------|----------------------|-----------------------|--------------------|----------------------|
| FTLD- <i>VCP</i> | M   | 47          | 7           | 1185                 | inanition             | 4                  | +                    |
| FTLD- <i>GRN</i> | M   | 64          | 21          | 1050                 | myocardial infarction | 3                  | +                    |
| FTLD-U           | F   | 67          | 2           | 990                  | myocardial infarction | 1                  | +                    |
| NL-1             | F   | 92          | 6           | 1120                 | myocardial infarction | NA                 | -                    |
| NL-2             | F   | 78          | 18          | 1290                 | duodenal cancer       | NA                 | -                    |
| AD-1             | F   | 93          | 17          | 1070                 | pneumonia             | NA                 | -                    |
| AD-2             | F   | 89          | 4.6         | 1050                 | aspiration pneumonia  | NA                 | -                    |

**Supplementary Table 1.** Demographic information of cases. FTLD-*VCP*; frontotemporal lobar degeneration *with valosin-containing* R1555H mutation; FTLD-*GRN*; FTLD with progranulin mutation (A9D); FTLD-U, sporadic FTLD with ubiquitin-immunoreactive inclusions; AD, Alzheimer’s disease; NL, normal aged control subject; PMI, post-mortem interval.

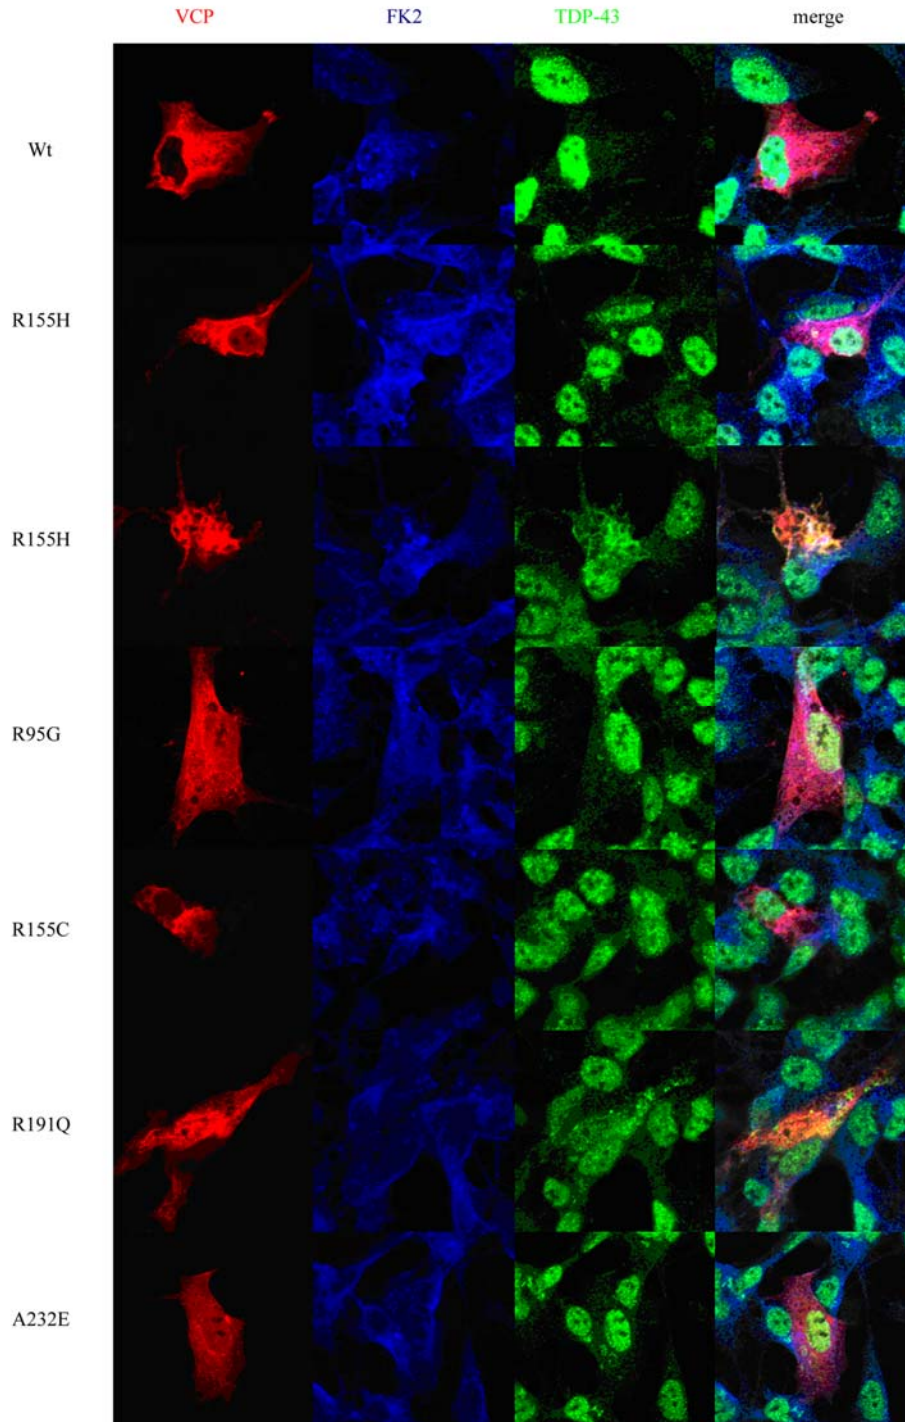

**Supplementary Figure 1.** Ubiquitin and TDP-43 distribution in overexpressed wild-type and mutant *VCP*. SHSY-5Y cells transiently transfected with monomeric dsRED-*VCP* constructs (red), TDP-43 (green) and FK2 (blue).

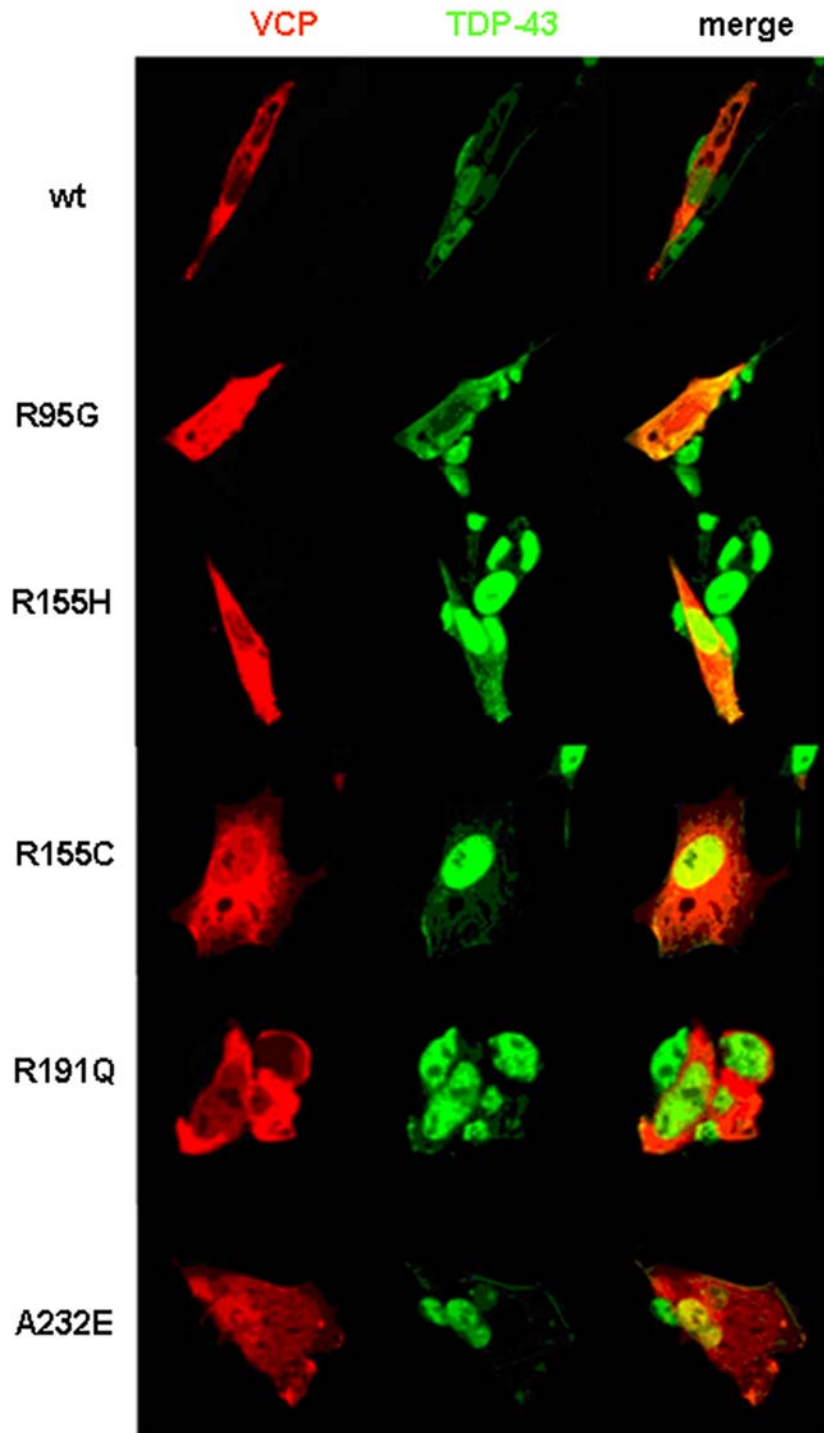

**Supplementary Figure 2.** PI3 kinase inhibitor (LY294002) treated cells show cytosolic distribution of TDP-43.

At 24 hours post-transfection after 5 hour incubation LY294002 (50 $\mu$ M); dsRED-VCP constructs (red) and TDP-43 (green).

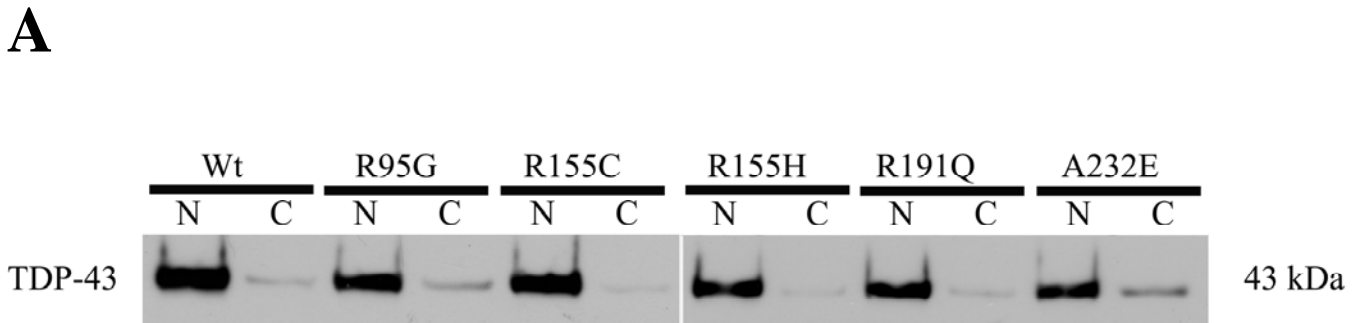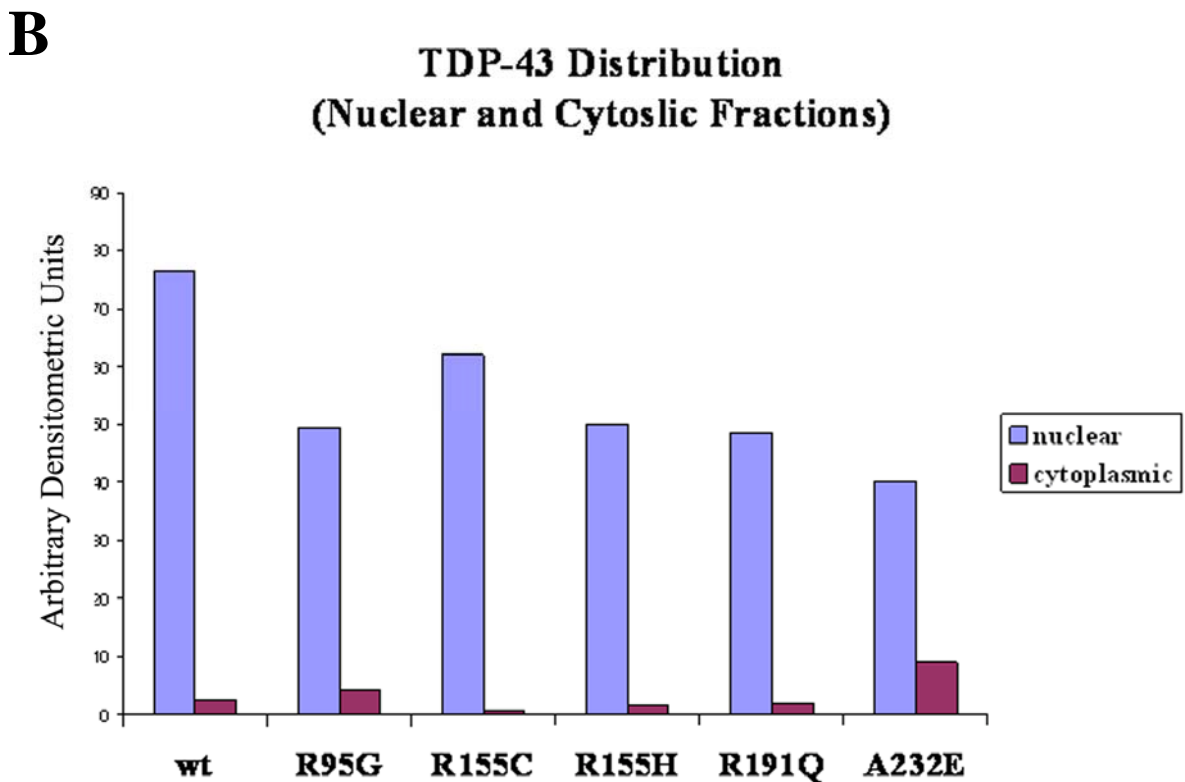

**Supplementary Figure 3. Mutations in VCP disrupt nuclear localization of TDP-43.**

**A)** Western blot analysis of nuclear (N) and cytosolic (C) fractions. **B)** Denoitemetric analysis of TDP-43 comparing wild-type and all mutant nuclear and cytosolic localization.
